# Supplementary material for: Out of the core: the impact of focal ischemia in regions beyond the penumbra
Source: PubMed Central journal article supplement (PMC10948541; doi:10.3389/fncel.2024.1336886), 2024-03-05
Supplement: Table_1.pdf [file Table_1.pdf]

|           |                                                    |
|-----------|----------------------------------------------------|
| ADCw      | Apparent diffusion coefficient of water            |
| APP       | Amyloid precursor protein                          |
| ATP       | Adenosine-triphosphate                             |
| BBB       | Blood-brain barrier                                |
| BDNF      | Brain-derived neurotrophic factor                  |
| BFGF      | Basic fibroblast growth factor                     |
| BrdU      | Bromodeoxyuridine                                  |
| C3d       | Complement component 3d                            |
| CA        | Cornu ammonis                                      |
| CC        | Corpus callosum                                    |
| CCA       | Common carotid artery                              |
| CD68      | Cluster of differentiation 68                      |
| CNS       | Central nervous system                             |
| CSPGs     | Chondroitin sulphate proteoglycans                 |
| CT        | Computing tomography                               |
| CX43      | Connexin 43                                        |
| DFX       | Deferoxamine                                       |
| DTI       | Diffusion tensor imaging                           |
| ECA       | External carotid artery                            |
| ECM       | Extracellular matrix                               |
| ECS       | Extracellular space                                |
| E/T ratio | Estradiol/testosterone ratio                       |
| FGL       | FG loop                                            |
| GAP-43    | Growth associated protein-43                       |
| GFAP      | Glial fibrillary acidic protein                    |
| HA        | Hyaluronan                                         |
| HAS-2     | Hyaluronan synthase-2                              |
| HIF-1     | Hypoxia-inducible factor 1                         |
| HO-1      | Heme oxygenase-1                                   |
| Hyal      | Hyaluronidase                                      |
| Iba-1     | Ionized calcium binding adaptor molecule 1         |
| ICAM-1    | Intercellular adhesion molecule 1                  |
| IL        | Interleukin                                        |
| INF       | Interferon                                         |
| LPA1      | Lysophosphatidic acid receptor 1                   |
| MAG       | Myelin-associated glycoprotein                     |
| MAP1LC3   | Microtubule-associated protein 1A/1B-light chain 3 |
| MAP2      | Microtubule-associated protein 2                   |
| MBP       | Myelin basic protein                               |
| MCA       | Middle cerebral artery                             |
| MCAO      | Middle cerebral artery occlusion                   |
| MCP-1     | Monocyte chemoattractant protein-1                 |
| MMPs      | Matrix metalloproteinases                          |
| MRI       | Magnetic resonance imaging                         |
| NSCs      | Neural stem cells                                  |
| NEP1-40   | Inhibitor against Nogo-A                           |
| NeuN      | Neuronal nuclear protein                           |
| NF200     | Neurofilament 200                                  |
| NO        | Nitric oxide                                       |
| NOGOA     | Neurite outgrowth inhibitor-A                      |
| NOS       | Nitric oxide synthase                              |

|                |                                                     |
|----------------|-----------------------------------------------------|
| Nrf-2          | Nuclear factor erythroid 2-related factor 2         |
| P2X7           | Purinergic receptor P2X7                            |
| PET            | Positron emission tomography                        |
| pMCAo          | Permanent Middle cerebral artery occlusion          |
| PNNs           | Perineuronal nets                                   |
| PPAR- $\gamma$ | Peroxisome proliferator-activated receptor $\gamma$ |
| PUFAs          | Polyunsaturated fatty acids                         |
| Ras            | Rat sarcoma virus                                   |
| Rhamm          | Hyaluronan receptor                                 |
| RhoA/ROCK      | A/Rho-associated protein kinase                     |
| ROS            | Reactive oxygen species                             |
| S100A10        | S100 calcium-binding protein A10                    |
| SGZ            | Subgranular zone                                    |
| SN             | Substantia nigra                                    |
| SVZ            | Subventricular zone                                 |
| TGF- $\beta$   | Transforming growth factor- $\beta$                 |
| tMCAO          | Transient Middle cerebral artery occlusion          |
| TNF- $\alpha$  | Tumor necrosis factor- $\alpha$                     |
| VEGF           | Vascular endothelial growth factor                  |
| VPN            | Ventroposterior thalamic nucleus                    |
| WFA            | Wisteria floribunda                                 |
| WM             | White matter                                        |
